# Supplementary material for: Within-Host Recombination in the Foot-and-Mouth Disease Virus Genome
Source: Viruses. 2018 Apr 25;10(5):221. doi: 10.3390/v10050221 (PMC5977214; doi:10.3390/v10050221)
Supplement: Supplementary file 1 [file viruses-10-00221-s001.txt]

GenBank accession number	Serotype
AY593752	A
AY593753	A
AY593754	A
AY593755	A
AY593756	A
AY593757	A
AY593758	A
AY593759	A
AY593760	A
AY593761	A
AY593762	A
AY593763	A
AY593764	A
AY593765	A
AY593766	A
AY593767	A
AY593768	A
AY593769	A
AY593770	A
AY593771	A
AY593772	A
AY593773	A
AY593774	A
AY593775	A
AY593776	A
AY593777	A
AY593778	A
AY593779	A
AY593780	A
AY593781	A
AY593782	A
AY593783	A
AY593784	A
AY593785	A
AY593786	A
AY593787	A
AY593788	A
AY593789	A
AY593790	A
AY593791	A
AY593792	A
AY593793	A
AY593794	A
AY593801	A
AY593802	A
AY593803	A
GQ406247	A
GQ406248	A
GQ406249	A
GQ406250	A
GQ406251	A
GQ406252	A
HM854021	A
HM854022	A
HM854023	A
HM854024	A
HM854025	A
HQ268509	A
HQ632773	A
HQ832576	A
HQ832577	A
HQ832578	A
HQ832579	A
HQ832580	A
HQ832581	A
HQ832582	A
HQ832583	A
HQ832584	A
HQ832585	A
HQ832586	A
HQ832587	A
HQ832588	A
HQ832589	A
HQ832590	A
HQ832591	A
HQ832592	A
JF749843	A
KC588943	A
KJ754939	A
KJ933864	A
KM268896	A
AY390432	Asia1
AY593795	Asia1
AY593796	Asia1
AY593797	Asia1
AY593798	Asia1
AY593799	Asia1
AY593800	Asia1
AY687333	Asia1
AY687334	Asia1
DQ533483	Asia1
DQ989303	Asia1
DQ989304	Asia1
DQ989305	Asia1
DQ989306	Asia1
DQ989307	Asia1
DQ989308	Asia1
DQ989309	Asia1
DQ989310	Asia1
DQ989311	Asia1
DQ989312	Asia1
DQ989313	Asia1
DQ989314	Asia1
DQ989315	Asia1
DQ989316	Asia1
DQ989317	Asia1
DQ989318	Asia1
DQ989319	Asia1
DQ989320	Asia1
DQ989321	Asia1
DQ989322	Asia1
DQ989323	Asia1
EF149009	Asia1
EF149010	Asia1
EF614458	Asia1
FJ906802	Asia1
GU931682	Asia1
HQ631363	Asia1
HQ632774	Asia1
JF739177	Asia1
KC412634	Asia1
KC462884	Asia1
KM268898	Asia1
AY593804	C
AY593805	C
AY593806	C
AY593807	C
AY593808	C
AY593809	C
AY593810	C
DQ409185	C
DQ409188	C
DQ409191	C
FJ824812	C
KM268897	C
AF506822	O
AF511039	O
AH012984	O
AH012985	O
AY317098	O
AY359854	O
AY593811	O
AY593812	O
AY593813	O
AY593814	O
AY593815	O
AY593816	O
AY593817	O
AY593818	O
AY593819	O
AY593820	O
AY593821	O
AY593822	O
AY593823	O
AY593824	O
AY593825	O
AY593826	O
AY593827	O
AY593828	O
AY593829	O
AY593830	O
AY593831	O
AY593832	O
AY593833	O
AY593834	O
AY593835	O
AY593836	O
AY593837	O
AY686687	O
DQ248888	O
DQ404158	O
DQ404159	O
DQ404160	O
DQ404161	O
DQ404162	O
DQ404163	O
DQ404164	O
DQ404165	O
DQ404166	O
DQ404167	O
DQ404168	O
DQ404169	O
DQ404170	O
DQ404171	O
DQ404172	O
DQ404173	O
DQ404174	O
DQ404175	O
DQ404176	O
DQ404177	O
DQ404178	O
DQ404179	O
DQ404180	O
DQ478936	O
DQ478937	O
EF175732	O
EF552688	O
EF552689	O
EF552690	O
EF552691	O
EF552692	O
EF552693	O
EF552694	O
EF552695	O
EF552696	O
EF552697	O
EF614457	O
EU214601	O
EU448368	O
EU448369	O
EU448370	O
EU448371	O
EU448372	O
EU448373	O
EU448374	O
EU448375	O
EU448376	O
EU448377	O
EU448378	O
EU448379	O
EU448380	O
EU448381	O
FJ175661	O
FJ175662	O
FJ175663	O
FJ175664	O
FJ175665	O
FJ175666	O
FJ542365	O
FJ542366	O
FJ542367	O
FJ542368	O
FJ542369	O
FJ542370	O
FJ542371	O
FJ542372	O
GU384682	O
GU384683	O
HM008917	O
HM229661	O
HQ009509	O
HQ268524	O
HQ412603	O
HQ632768	O
HQ632769	O
HQ632770	O
HQ632771	O
HQ632772	O
JF749851	O
JN998085	O
JN998086	O
JQ900581	O
JQ973889	O
JX040485	O
JX040486	O
JX040487	O
JX040488	O
JX040489	O
JX040490	O
JX040491	O
JX040492	O
JX040493	O
JX040494	O
JX040495	O
JX040496	O
JX040497	O
JX040498	O
JX040499	O
JX040500	O
JX040501	O
JX066664	O
JX066665	O
JX570638	O
JX570639	O
JX570640	O
JX570641	O
JX570642	O
JX570643	O
JX570644	O
JX570645	O
JX570646	O
JX570647	O
JX570648	O
JX570649	O
JX570650	O
JX570651	O
JX570652	O
JX570653	O
JX570654	O
JX570655	O
JX869177	O
JX869178	O
JX869179	O
JX869180	O
JX869181	O
JX869182	O
JX869183	O
JX869184	O
JX869185	O
JX869186	O
JX869187	O
JX869188	O
JX947858	O
JX947859	O
KC503937	O
KF112879	O
KF112880	O
KF112881	O
KF112882	O
KF112883	O
KF112884	O
KF112885	O
KF112886	O
KF112887	O
KF112888	O
KF112889	O
KF501486	O
KF501487	O
KF501488	O
KF694731	O
KF694732	O
KF694733	O
KF694734	O
KF694735	O
KF694736	O
KF694737	O
KF694738	O
KF694739	O
KF694740	O
KF694741	O
KF694742	O
KF694743	O
KF694744	O
KF694745	O
KF694746	O
KF985189	O
KJ206908	O
KJ206909	O
KJ206910	O
KJ825801	O
KJ825802	O
KJ825803	O
KJ825804	O
KJ825805	O
KJ825806	O
KJ825807	O
KJ825808	O
KJ825809	O
KM257061	O
KM257062	O
KM257063	O
KM257064	O
KM257065	O
KM268895	O
AY593839	SAT1
AY593840	SAT1
AY593841	SAT1
AY593842	SAT1
AY593843	SAT1
AY593844	SAT1
AY593845	SAT1
AY593846	SAT1
JF749860	SAT1
KM268899	SAT1
AY593847	SAT2
AY593848	SAT2
AY593849	SAT2
JF749862	SAT2
JX014255	SAT2
JX014256	SAT2
KM268900	SAT2
AY593851	SAT3
AY593852	SAT3
AY593853	SAT3
KJ820999	SAT3
KM268901	SAT3
